# Supplementary figures and images for: A Randomized Controlled Comparison of Seclusion and Mechanical Restraint in Inpatient Settings
Source: Atypon-hosted journal article supplement (doi:10.1176/ps.62.11.pss6211_1310), 2011-11-01

# CONSORT diagram showing enrollment, randomization, and analysis

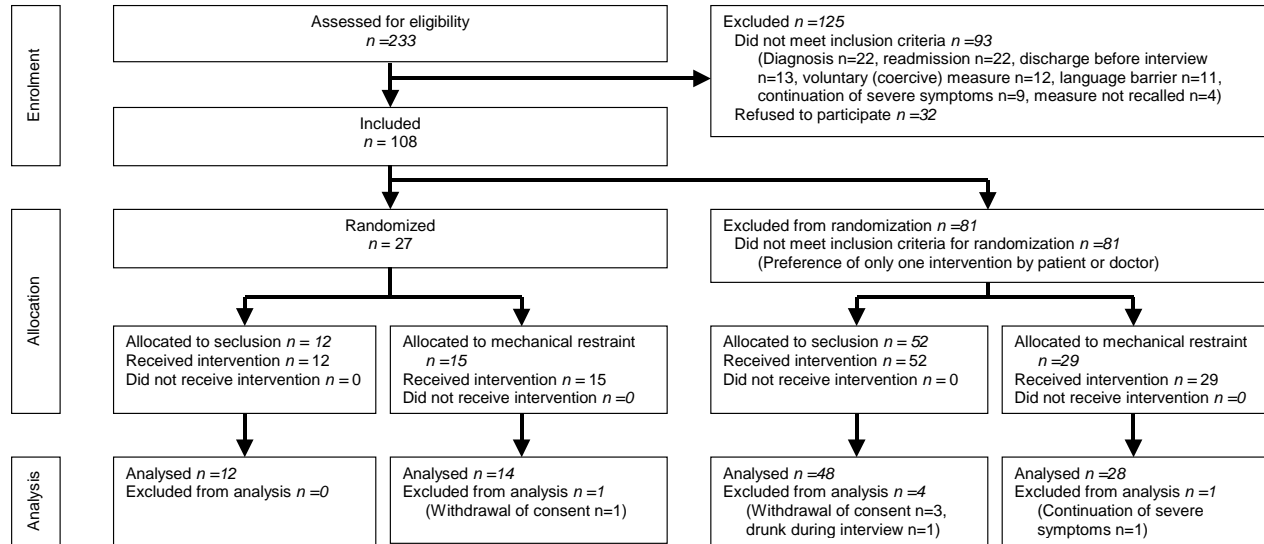

Supplement: pss_62_11_1310_ds001.pdf [file pss_62_11_1310_ds001.pdf]
